# Supplementary material for: Upregulation of CD11b and CD86 through LSD1 inhibition promotes myeloid differentiation and suppresses cell proliferation in human monocytic leukemia cells
Source: PubMed Central journal article supplement (PMC5689595; doi:10.18632/oncotarget.18564), 2017-06-19
Supplement: oncotarget-08-85085-s001.pdf [file oncotarget-08-85085-s001.pdf]

# Upregulation of CD11b and CD86 through LSD1 inhibition promotes myeloid differentiation and suppresses cell proliferation in human monocytic leukemia cells

## SUPPLEMENTARY MATERIALS

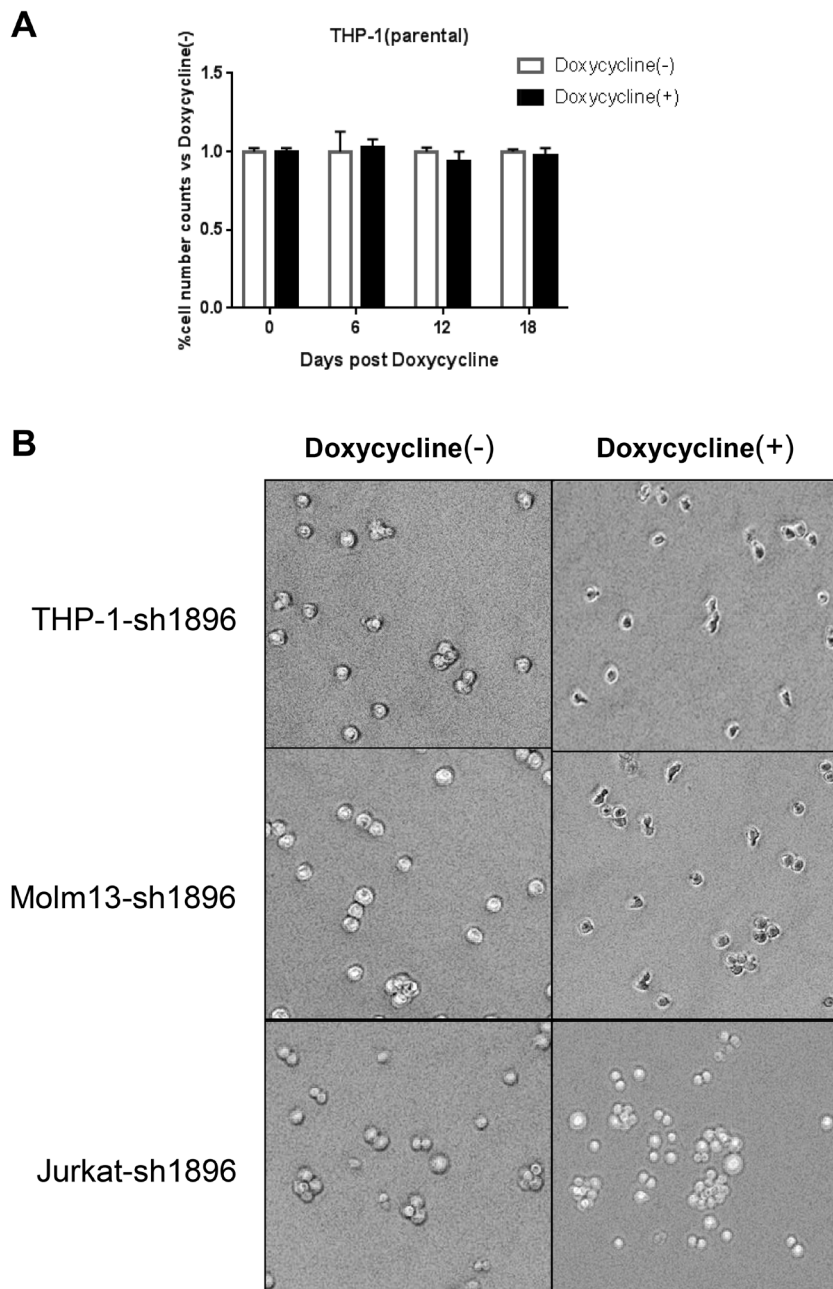

**Supplementary Figure 1: Analysis of cell proliferation and morphology in THP-1, Molm13 and Jurkat with LSD1 knockdown.** (A) Effects of Dox (0.5 ug/ml) induced LSD1 Knockdown effect on cell growth in THP-1 (parental) on Day 0, Day 6, Day 12, Day 18 by cell number counting. (B) Cell morphology change upon Dox (0.5 ug/ml) induced LSD1 Knockdown for 96 hours in pLenti6.3 V5-shRNA1896/1970 infected THP-1, Molm13 and Jurkat at a lower cell density.

**A**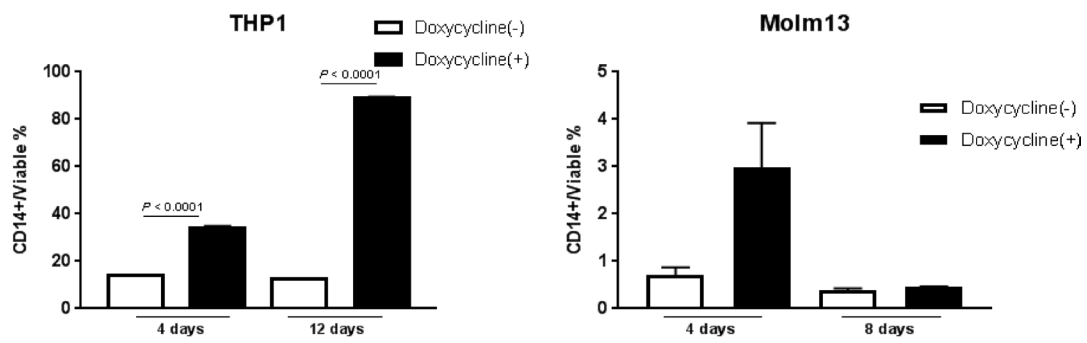**B**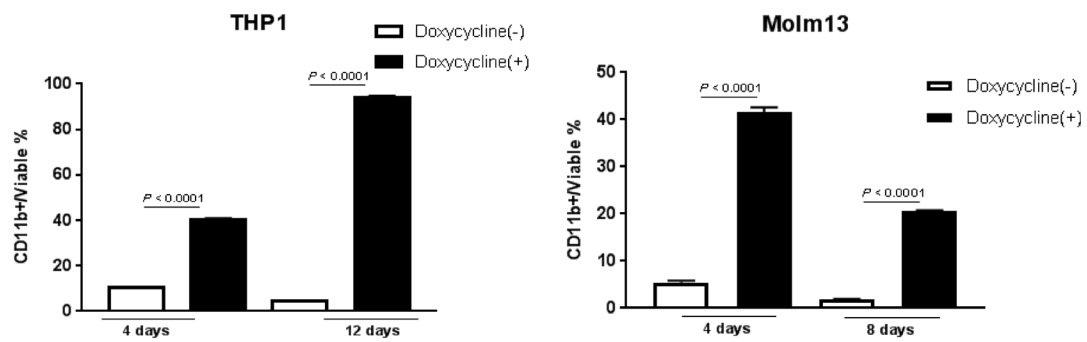**C**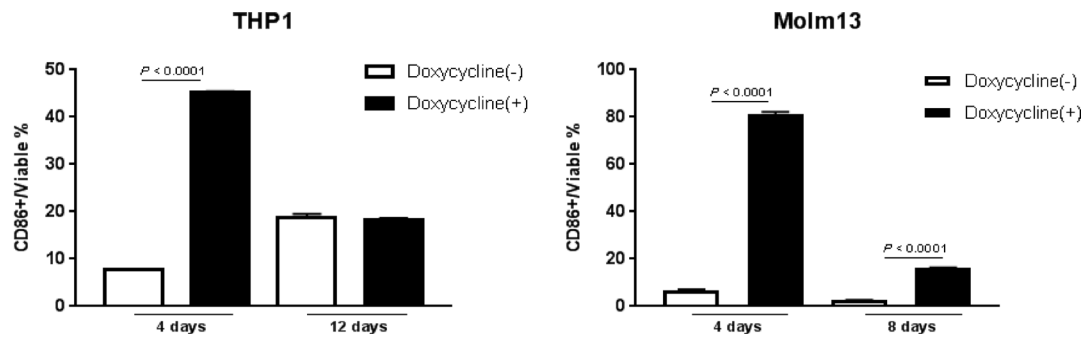

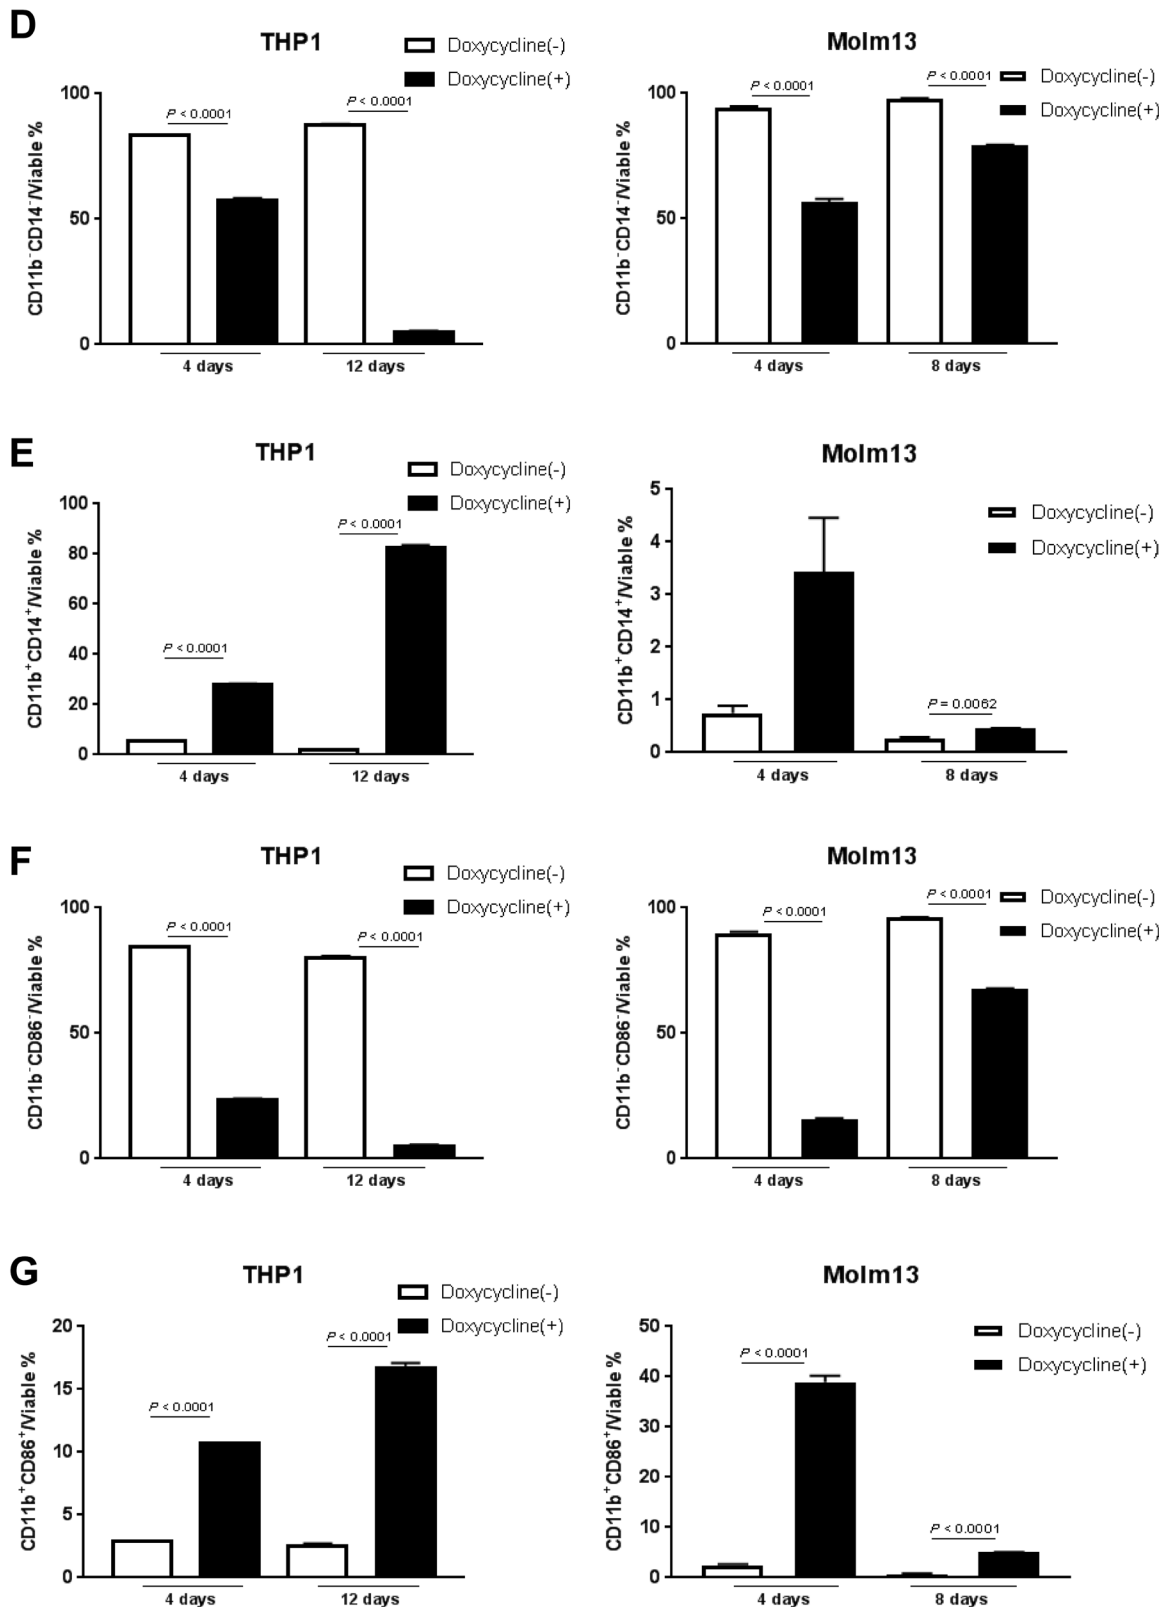

**Supplementary Figure 2: FACS analysis of surface expression levels of CD14, CD11b and CD86 in THP-1 and Molm13 with long term knockdown of LSD1.** (A–C) FACS analysis of Dox (0.5 ug/ml) induced LSD1-shRNA Knockdown for 4 days, 8 days (Molm13) or 12 days (THP-1) on CD14, CD11b and CD86 protein level in THP-1 and Molm13. (D–G) FACS analysis of Dox (0.5 ug/ml) induced LSD1-shRNA Knockdown for 4 days, 8 days or 12 days on CD11b<sup>+</sup>CD14<sup>-</sup>, CD11b<sup>+</sup>CD14<sup>+</sup>, CD11b<sup>+</sup>CD86<sup>-</sup>, CD11b<sup>+</sup>CD86<sup>+</sup> protein level in THP-1 and Molm13. Use 7-AAD or fixable viability dye as the indicator of cell viability.

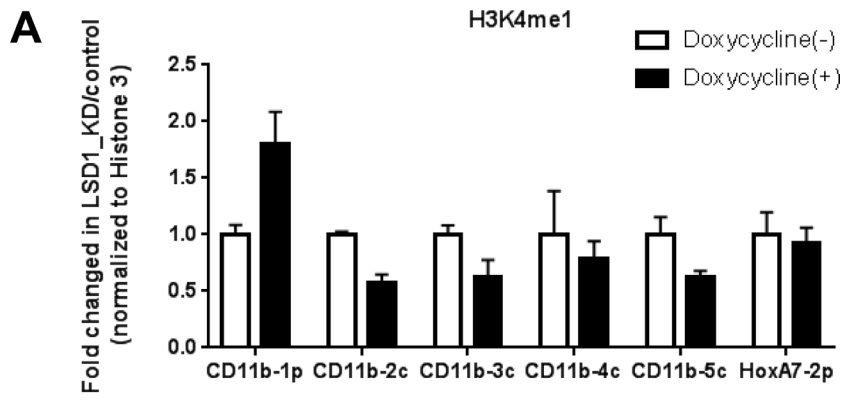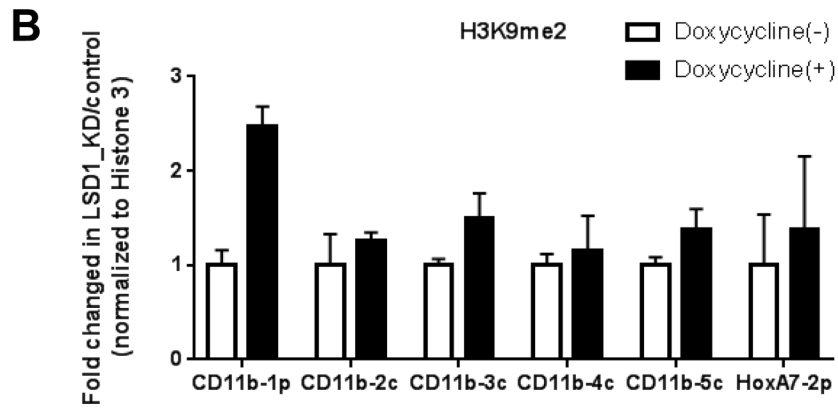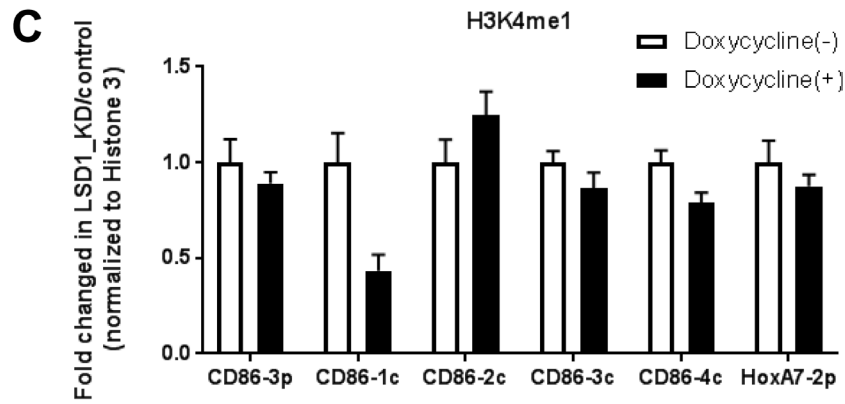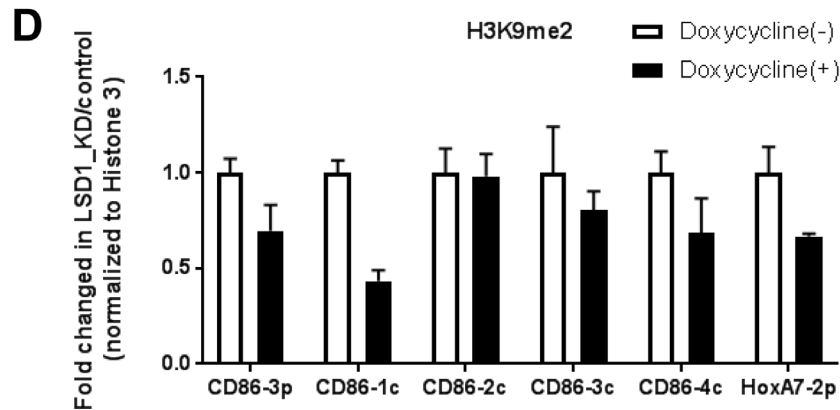

**E**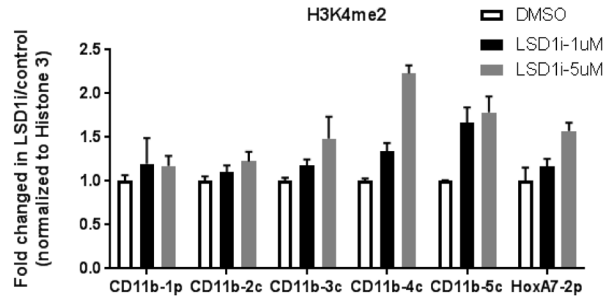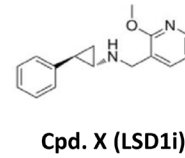**F**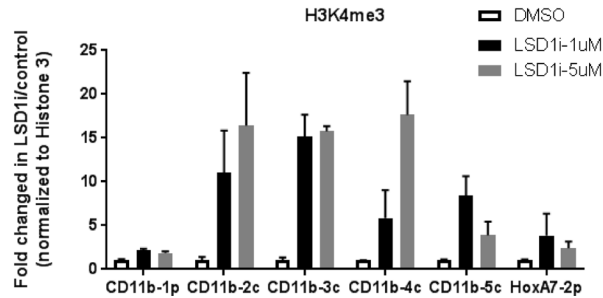**G**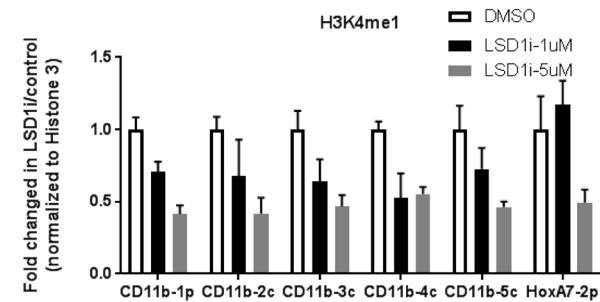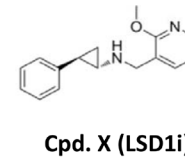**H**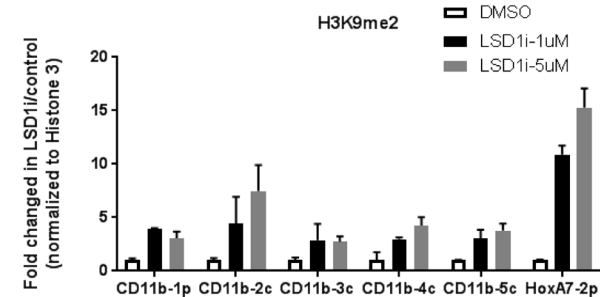

**Supplementary Figure 3: ChIP-qPCR analysis of H3K4me1 and H3K4me3 levels on the promoter regions of CD11b and CD86 in THP-1 and Molm13.** (A) ChIP-qPCR analysis of H3K4me1 levels on the promoter regions of CD11b in THP-1 with Dox induced LSD1 Knockdown for 96 hours. (B) ChIP-qPCR analysis of H3K9me2 levels on the promoter regions of CD11b in THP-1 with Dox induced LSD1 Knockdown for 96 hours. (C) ChIP-qPCR analysis of H3K4me1 levels on the promoter regions of CD86 in THP-1 with Dox induced LSD1 Knockdown for 96 hours. (D) ChIP-qPCR analysis of H3K4me3 levels on the promoter regions of CD86 in THP-1 with Dox induced LSD1 Knockdown for 96 hours. (E) ChIP-qPCR analysis of H3K4me2 levels on the promoter regions of CD11b in Molm13 treated with LSD1i for 96 hours. (F) ChIP-qPCR analysis of H3K4me3 levels on the promoter regions of CD11b in Molm13 treated with LSD1i for 96 hours. (G) ChIP-qPCR analysis of H3K4me1 levels on the promoter regions of CD11b in Molm13 treated with LSD1i for 96 hours. (H) ChIP-qPCR analysis of H3K9me2 levels on the promoter regions of CD11b in Molm13 treated with LSD1i for 96 hours. Five pairs of primers (CD11b-1p, 2c, 3c, 4c, 5c) were designed for the promoter regions of CD11b. Five pairs of primers (CD86-3p, 1c, 2c, 3c, 4c) were designed for the promoter regions of CD86 with HoxA7-2p primer as the assay control. All the data are normalized to Histone 3.

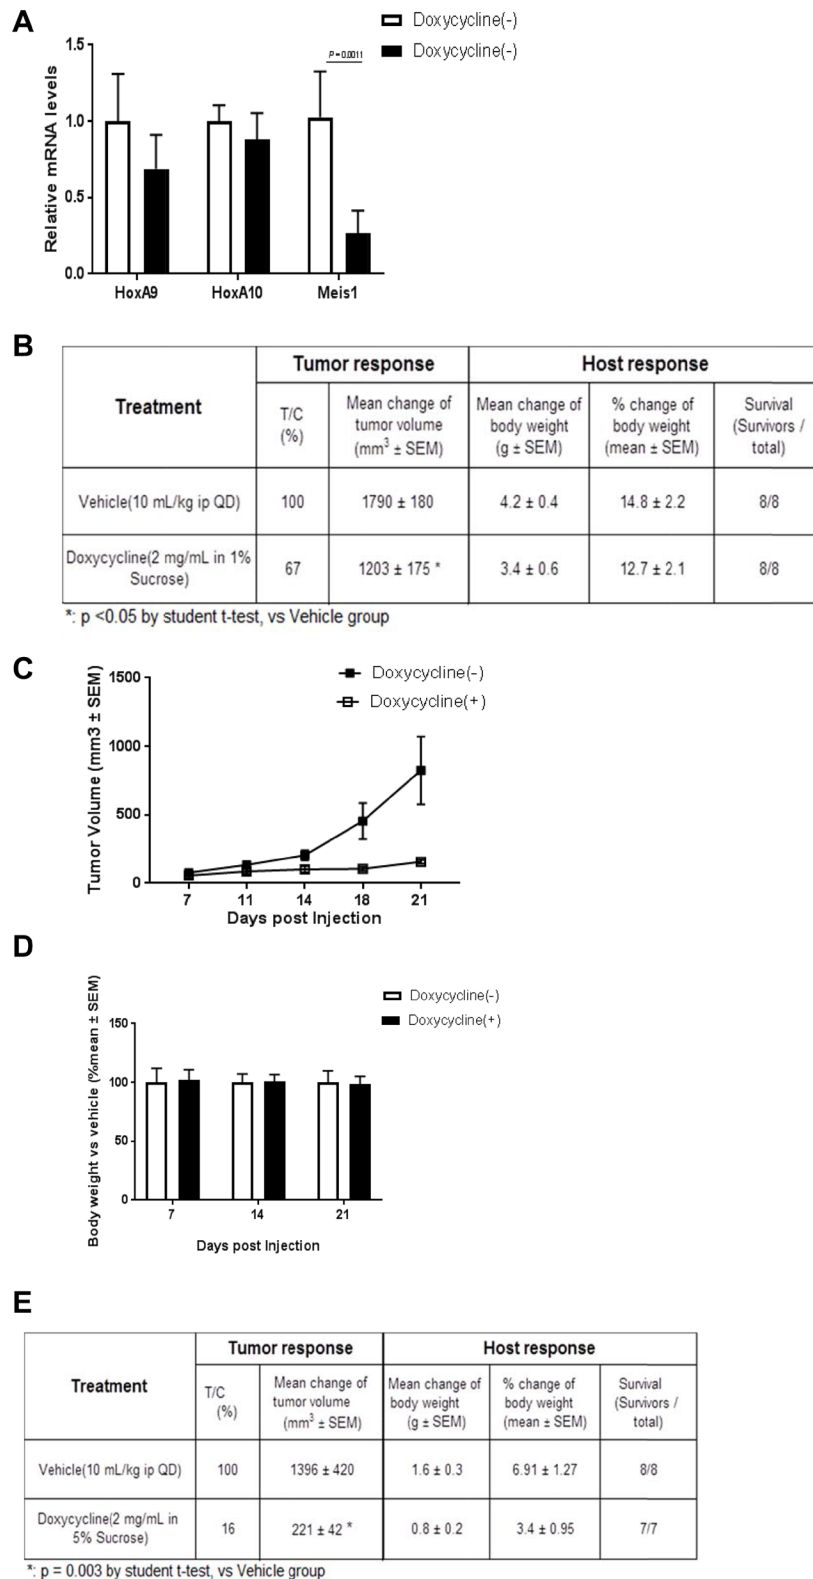

**Supplementary Figure 4: Knockdown of LSD1 inhibits tumor growth *in vivo*.** (A) Meis1, HoxA9 and HoxA10 mRNA levels analysis by RT-PCR in Balb/c mouse THP-1 shRNA1896 xenograft model. (B) Statistical analysis of anti-tumor growth effect in Balb/c mouse THP-1 shRNA1896 xenograft model. (C) Tumor growth analysis in Balb/c mouse THP-1 shRNA1896 xenograft models. Final tumor volume was compared in tumor-bearing animals receiving water contained Vehicle (10 ml/kg) and Dox (2mg/ml) with 5% sucrose. (D) Body weight change analysis in Balb/c mouse THP-1 shRNA1896 xenograft models. Final body weight was compared in tumor-bearing animals receiving water contained Vehicle (10 ml/kg) and Dox (2mg/ml) with 5% sucrose. (E) Statistical analysis of anti-tumor growth effect in Balb/c mouse THP-1 shRNA1896 xenograft model.
